# Supplementary material for: Antioxidant Activity, Stability in Aqueous Medium and Molecular Docking/Dynamics Study of 6-Amino- and N-Methyl-6-amino-L-ascorbic Acid
Source: MDPI journal article supplement (doi:10.3390/ijms24021410), 2023-01-11
Supplement: s1 [file s1]

## Supplementary materials

# Antioxidant Activity, Stability in Aqueous Medium and Molecular Docking/Dynamics Study of 6-Amino- and *N*-Methyl-6-amino-L-ascorbic Acid

Lara Saftić Martinović <sup>1</sup>, Nada Birkic <sup>1</sup>, Vedran Miletić <sup>2</sup>, Roberto Antolović <sup>3</sup>, Danijela Štanfel <sup>4</sup> and Karlo Wittine <sup>5,\*</sup>

1 Department of Biotechnology, University of Rijeka, Radmile Matejčić 2, 51000 Rijeka, Croatia

2 Group for Applications and Services on Exascale Research Infrastructure, Faculty of Informatics and Digital Technologies, University of Rijeka, Radmile Matejčić 2, 51000 Rijeka, Croatia

3 Department of Nursing, School of Medicine, Catholic University of Croatia, Ilica 242, 10000 Zagreb, Croatia

4 Jadran-Galenski Laboratorij d.d., Svilno 20, 51000 Rijeka, Croatia

5 Selvita Ltd., Prilaz Baruna Filipovića 29, 10000 Zagreb, Croatia

\* Correspondence: karlo.wittine@selvita.com; Tel.: +385-95-396-8668

(A)

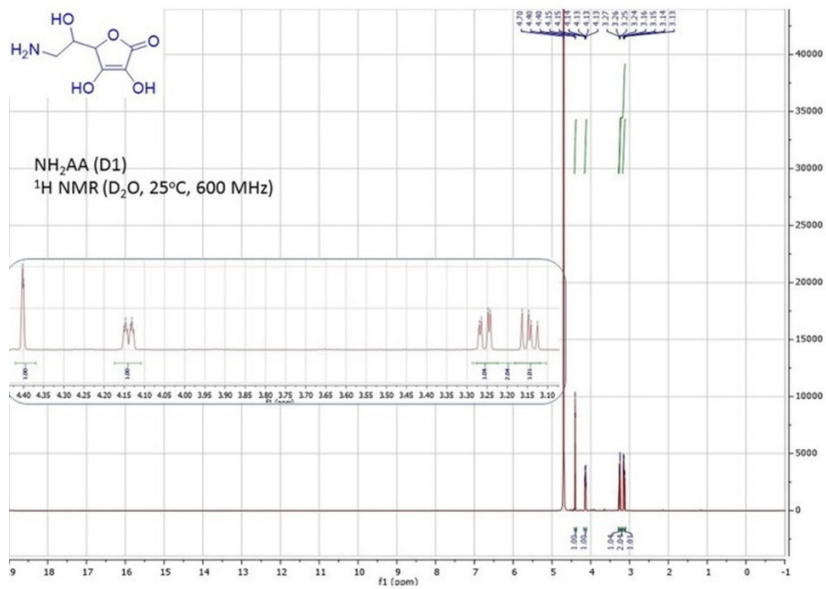

(B)

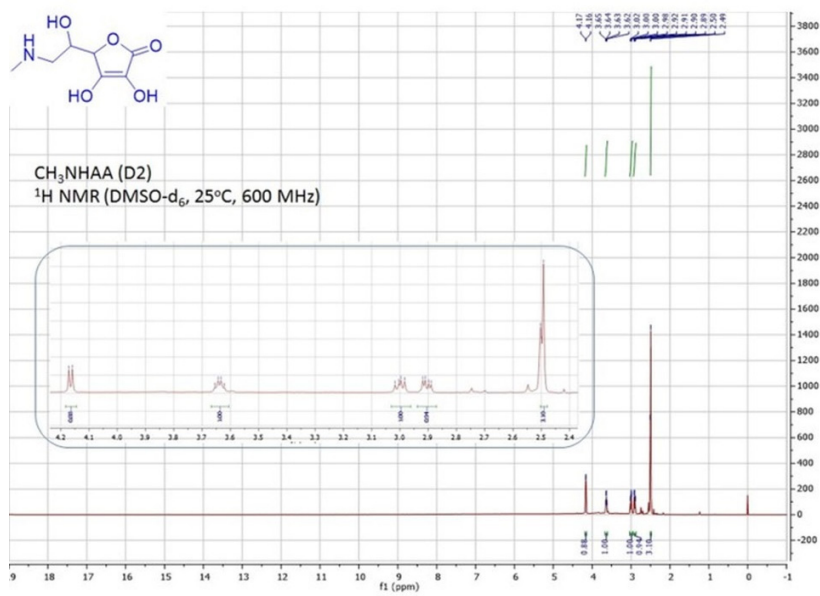

**Figure S1.** NMR spectrum of NH<sub>2</sub>AA (D1) (**A**) and CH<sub>3</sub>NHAA (D2) (**B**).

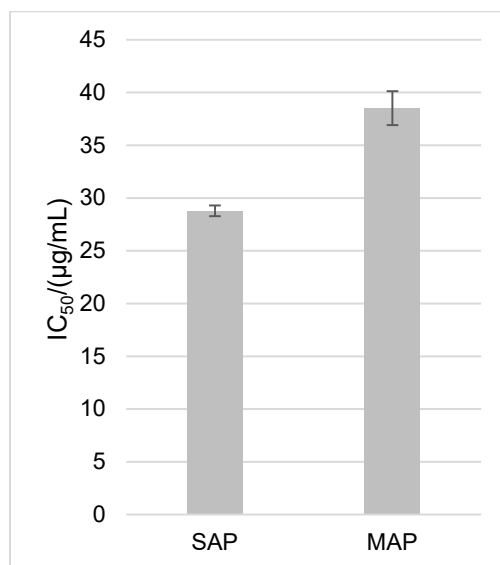

**Figure S2.** ABTS antioxidant activity of sodium ascorbyl phosphate (SAP) and magnesium ascorbyl phosphate (MAP) at day 0. Results are presented in  $\mu\text{g/mL} \pm$  standard deviation.

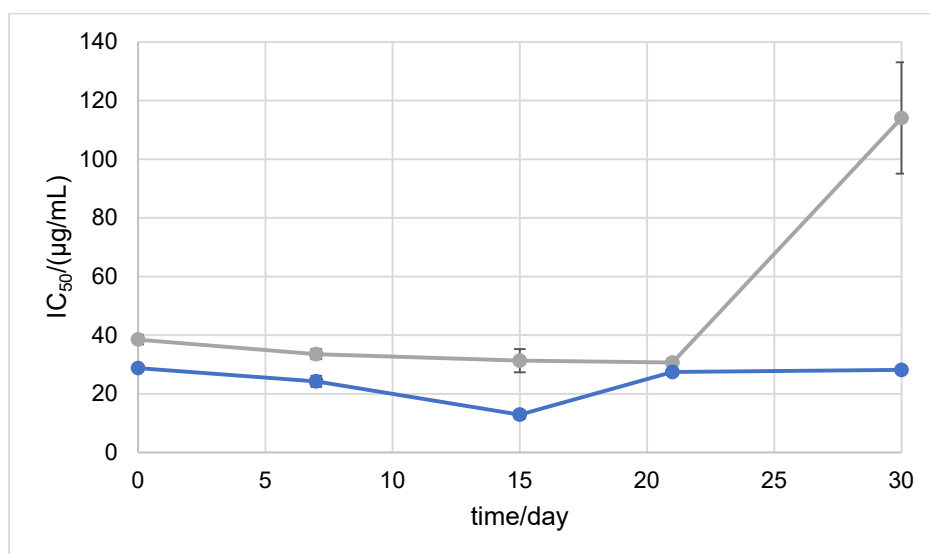

**Figure S3.** ABTS antioxidant stability of sodium ascorbyl phosphate (SAP) and magnesium ascorbyl phosphate (MAP) analysed after 0,7,15,21 and 30 days of incubation at 20 °C in the dark. Results are presented in  $\mu\text{g/mL} \pm$  standard deviation. SAP derivative is shown in blue and MAP derivative in gray.

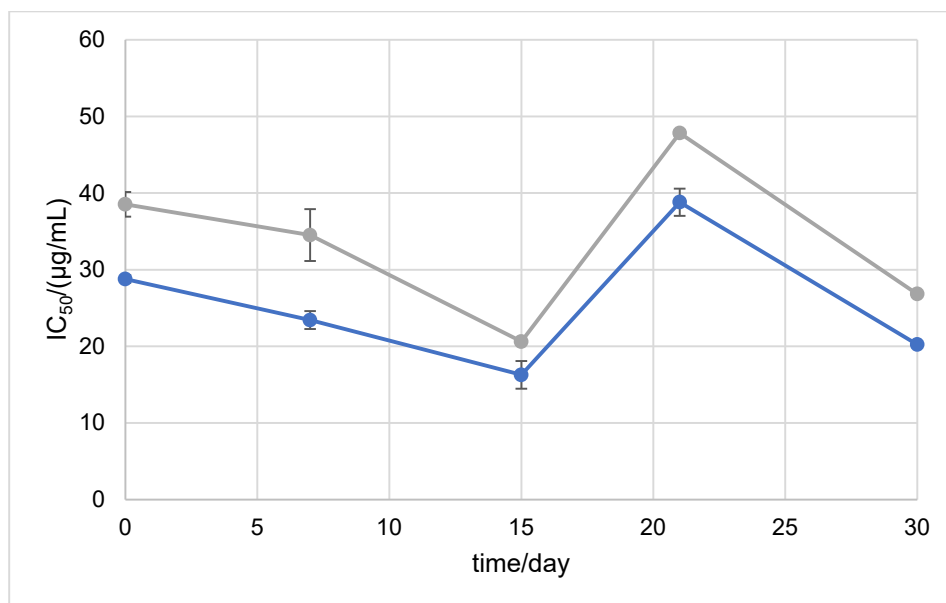

**Figure S4.** ABTS antioxidant stability of sodium ascorbyl phosphate (SAP) and magnesium ascorbyl phosphate (MAP) analysed after 0,7,15,21 and 30 days of incubation at 4 °C in the dark. Results are presented in  $\mu\text{g/mL} \pm$  standard deviation. SAP derivative is shown in blue and MAP derivative in gray.

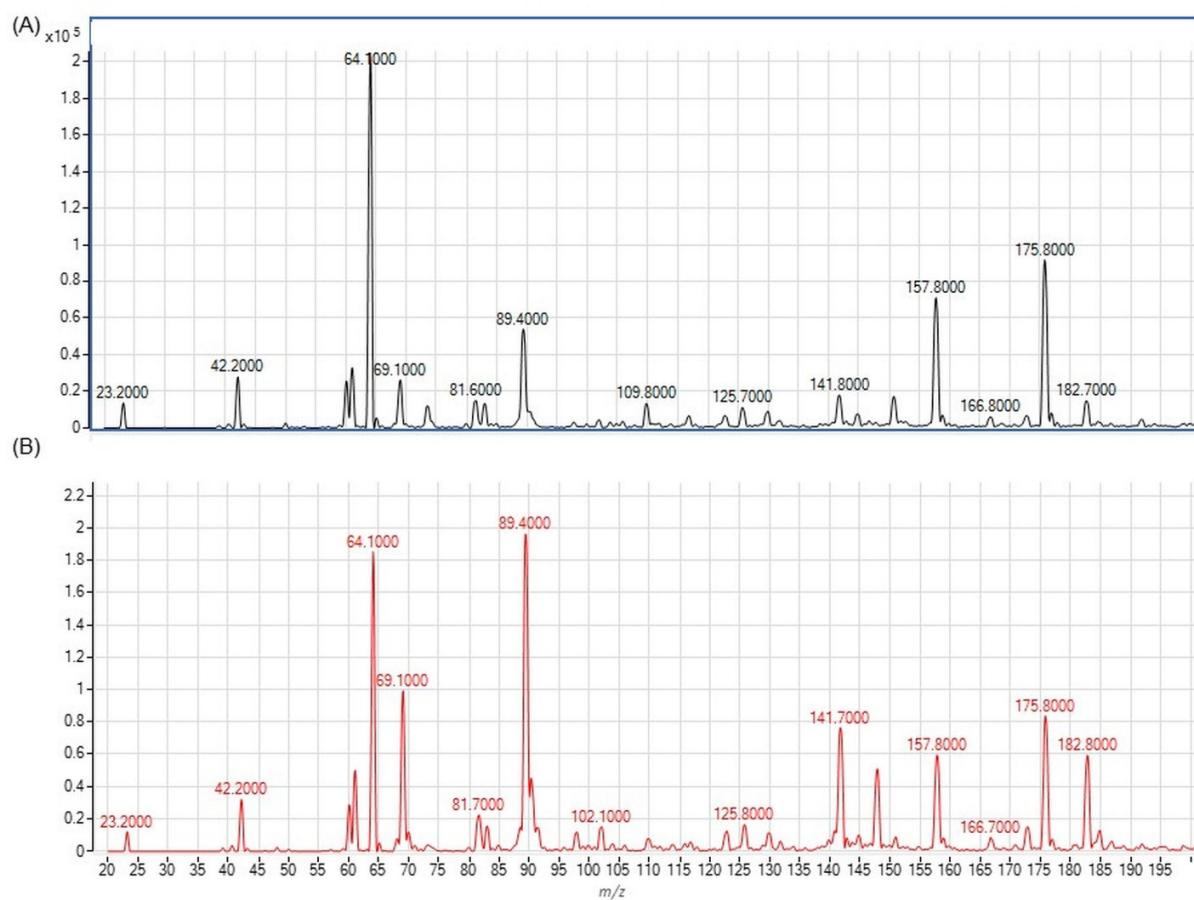

**Figure S5.** MS scan of  $\text{NH}_2\text{AA}$  (D1) in acidic medium analyzed on day 0 (A) and day 30 (B).

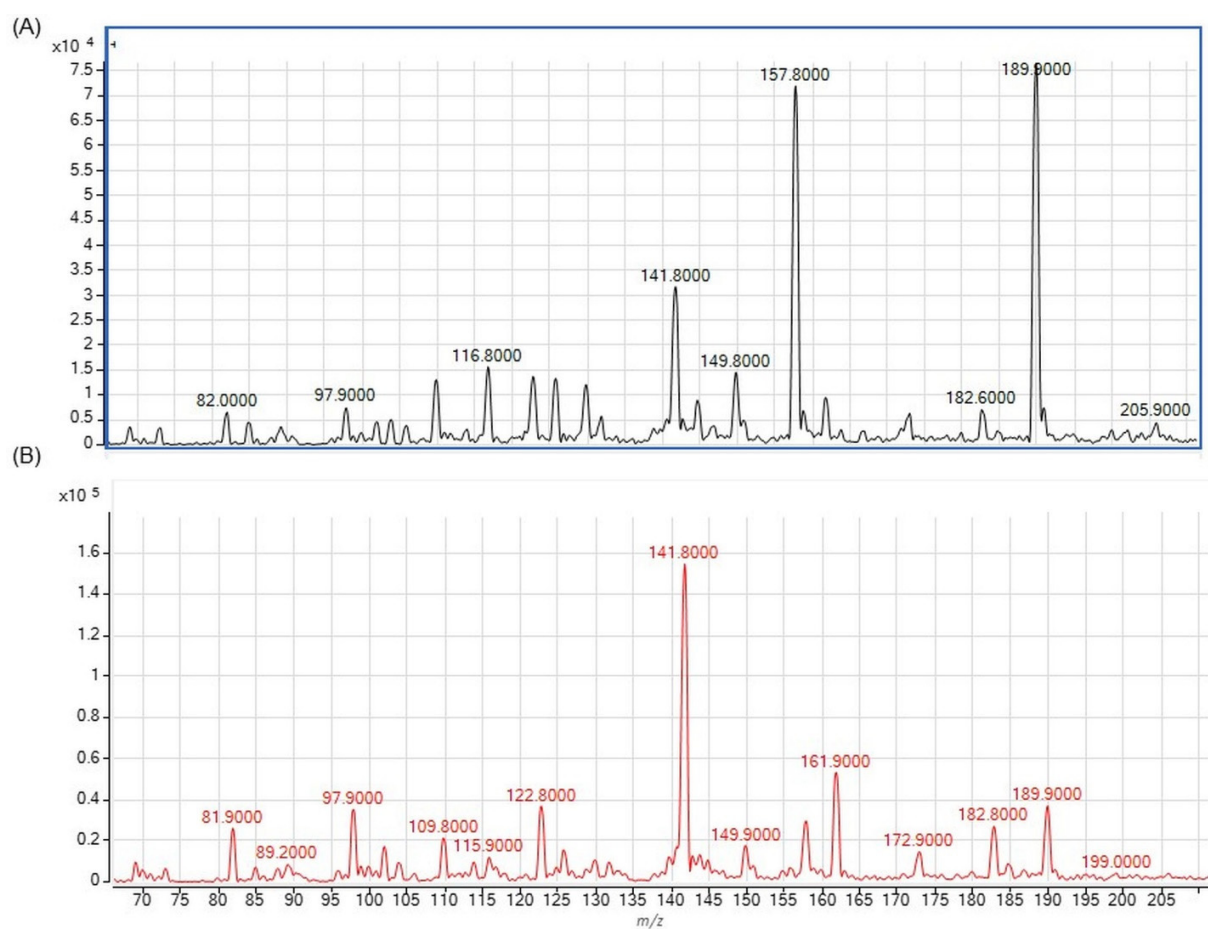

**Figure S6.** MS scan of  $\text{CH}_3\text{NHAA}$  (D2) in acidic medium analyzed on day 0 (A) and day 30 (B).

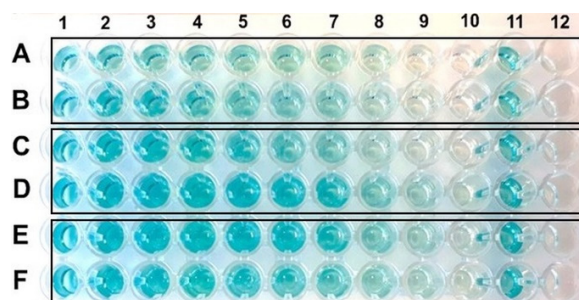

**Figure S7.** ABTS analysis of newly synthesized derivatives:  $\text{NH}_2\text{AA}$  (D1) and  $\text{CH}_3\text{NHAA}$  (D2) on a microtiter plate. Rows A, B, C denote derivative D1, rows D, E, F denote derivative D2. Column 11 contains a blank sample (Milli-Q water and ABTS solution for analysis), column 12 contains a blank (Milli-Q water).

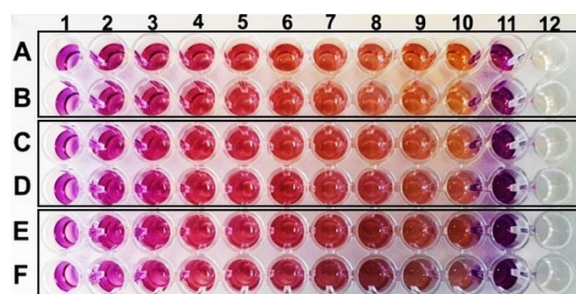

**Figure S8.** DPPH analysis of newly synthesized derivatives:  $\text{NH}_2\text{AA}$  (D1) and  $\text{CH}_3\text{NHAA}$  (D2) on a microtiter plate. Rows A, B, C denote derivative D1, rows D,E,F denote derivative D2. Column 11 contains a blank sample (Milli-Q water and DPPH solution for analysis), column 12 contains a blank (Milli-Q water).
